# Supplementary material for: Solution properties of the LnIII complexes of a novel octadentate chelator with rigidified iminodiacetate arms
Source: Royal Society of Chemistry journal article supplement (doi:10.1039/c2dt31684f), 2012-01-01
Supplement: c2dt31684f.pdf [file c2dt31684f.pdf]

## Supporting Information

For

### **Solution properties of the Ln<sup>III</sup> complexes of a novel octadentate chelator with rigidified iminodiacetate arms**

Lorenzo Tei<sup>[a]</sup>, Zolt Baranyai<sup>[b]</sup>, Claudio Cassino<sup>[a]</sup>, Marianna Fekete<sup>[a]</sup>, Ferenc K. Kálmán<sup>[b]</sup> and  
Mauro Botta<sup>\*[a]</sup>

<sup>a</sup> Dipartimento di Scienze ed Innovazione Tecnologica, Università del Piemonte Orientale “Amedeo  
Avogadro” Viale T. Michel 11, I-15121, Alessandria, Italy;

<sup>b</sup> Department of Inorganic and Analytical Chemistry, University of Debrecen,  
H-4010, Debrecen, Egyetem tér 1., Hungary

#### **Contents:**

1. Protonation and complexation equilibria (p. 2)
2. Kinetic studies (p. 4)
3. Variable temperature <sup>1</sup>H and <sup>13</sup>C NMR spectra (p. 9)
4. Relaxometric properties (p. 14)

## 1. Protonation and complexation equilibria

The protonation constants of the ligand are defined by Equation (1):

$$K_i^H = \frac{[H_iL]}{[H_{i-1}L][H^+]} \quad (1)$$

where  $i=1, 2 \dots 4$ . These were determined by both pH-potentiometric and  $^1\text{H}$ -NMR titrations. At different pH values,  $^1\text{H}$  NMR signals display sharp changes related to the protonation of the ligand. Since the protonation/deprotonation of the different donor atoms is generally fast process on the NMR time scale, the chemical shifts of the observed signals represent a weighted average of the shifts of the different species involved in a specific protonation step (Eq. 2):

$$\delta_{H(obs)} = \sum x_i \delta_H^{H_iL} \quad (2)$$

where,  $\delta_{H(obs)}$  is the observed chemical shift of a given signal,  $x_i$  and  $\delta_H^{H_iL}$  are the molar fraction and the chemical shift of the involved species, respectively (the molar fractions  $x_i$  of the different protonated species are expressed with the use of the protonation constants  $K_i^H$ ).

The stability and protonation constants of the metal complexes formed with the chelating ligands **L1** and EGTA are defined by Equations (3) and (4). The best fitting was obtained by using the model which includes the formation of *ML* and *MHL* species.

$$K_{ML} = \frac{[ML]}{[M][L]} \quad (3)$$

$$K_{MH_iL} = \frac{[MH_iL]}{[MH_{i-1}L][H^+]} \quad (4)$$

where  $i=1$ . The titration data for **L1** and EGTA in the presence of  $\text{Zn}^{2+}$  and  $\text{Cu}^{2+}$  indicate base consuming process at  $\text{pH} > 9$ . This process can be interpreted by assuming the coordination of  $\text{OH}^-$  ion according to Equation (5):

$$K_{MLH_{-1}} = \frac{[ML]}{[M(OH)L][H^+]} \quad (5)$$

pH-potentiometric titrations were also made at 2:1 metal-to-ligand ratio in order to examine the possible formation of dinuclear  $\text{Zn}^{2+}$  and  $\text{Cu}^{2+}$  complexes. The stability and protonation constants of the dinuclear-, dinuclear-monohydroxo- and dinuclear-dihydroxo-complexes are defined by Equations (6), (7) and (8), respectively.

$$K_{\text{M}_2\text{L}} = \frac{[\text{M}_2\text{L}]}{[\text{ML}][\text{M}]} \quad (6)$$

$$K_{\text{M}_2\text{LH}_1} = \frac{[\text{M}_2\text{L}]}{[\text{M}_2(\text{OH})\text{L}][\text{H}^+]} \quad (7)$$

$$K_{\text{M}_2\text{LH}_2} = \frac{[\text{M}_2(\text{OH})\text{L}]}{[\text{M}_2(\text{OH})_2\text{L}][\text{H}^+]} \quad (8)$$

As explained in the text, in the presence and absence of  $\text{Mg}^{2+}$  ion the shape of the titration curve of **L1** is the same (Figure S1). The fitting of the data obtained in these titrations did not give any reasonable result for the stability constant of the  $\text{Mg}^{2+}$  complex.

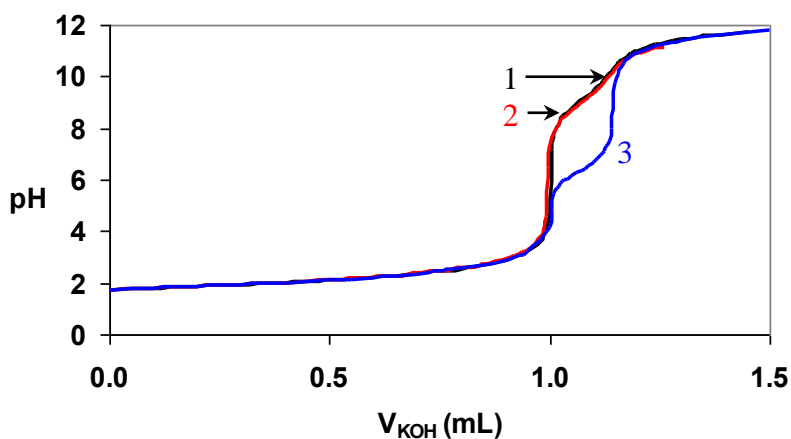

**Figure S1.** Titration curve of the  $\text{H}_4\text{L1}$  ligand in the absence (1) and in the presence of  $\text{Mg}^{2+}$  (2) and  $\text{Ca}^{2+}$  (3) ( $[\text{H}_4\text{L1}] = [\text{Mg}^{2+}] = [\text{Ca}^{2+}] = 2 \text{ mM}$ ,  $[\text{HCl}] = 16 \text{ mM}$ ,  $[\text{KOH}] = 0.2 \text{ M}$ ,  $0.1 \text{ M KCl}$ ,  $25^\circ\text{C}$ )

## 2. Kinetic studies

The rates of the transmetallation reactions of  $[\text{Gd}(\text{L1})]^-$  and  $[\text{Gd}(\text{EGTA})]^-$  were studied by UV-spectrophotometry with the use of  $\text{Cu}^{2+}$  and  $\text{Eu}^{3+}$  as exchanging metal ions. In the presence of excess of the exchanging ion the transmetallation can be treated as a pseudo-first-order process and the reaction rate can be expressed with the Eq. (9), where  $k_d$  is a pseudo-first-order rate constant,  $[\text{GdL}]_t$  and  $[\text{GdL}]_{\text{tot}}$  are the concentrations of the GdL species at time  $t$  and the total concentration of the complex, respectively.

$$-\frac{d[\text{GdL}]_t}{dt} = k_d[\text{GdL}]_{\text{tot}} \quad (9)$$

The rates of the transmetallation reactions were studied at different concentrations of the exchanging ions in the pH range 4.0 – 6.3. The obtained rate constants  $k_d$  are presented as a function of the pH in Figures S2, S3, S4 and S5.

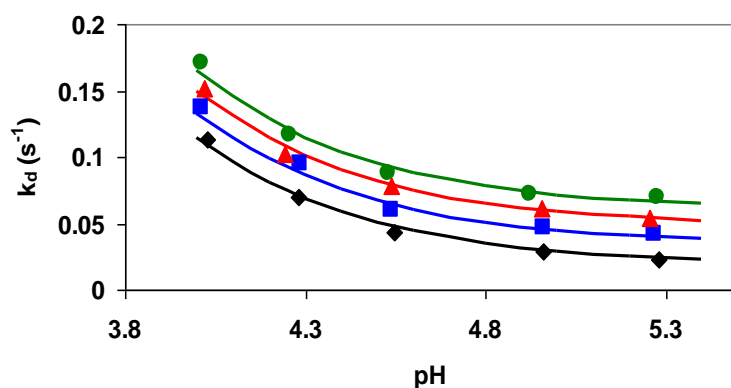

**Figure S2.** Pseudo-first order rate constants ( $k_d$ ) of the metal exchange reactions of  $[\text{GdL1}]^-$  with  $\text{Cu}^{2+}$  ions as a function of pH ( $[\text{Gd}(\text{L1})^-]=0.1$  mM,  $[\text{Cu}^{2+}]=1$  mM (◆), 2 mM (■), 3 mM (▲) and 4 mM (●); 0.1 M KCl, 25 °C)

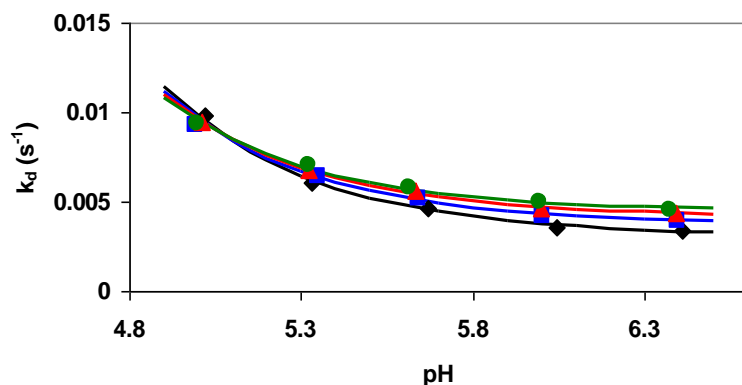

**Figure S3.** Pseudo-first order rate constants ( $k_d$ ) of the metal exchange reactions of  $[\text{Gd}(\text{L1})]^-$  with  $\text{Eu}^{3+}$  ions as a function of pH ( $[\text{Gd}(\text{L1})]^- = 0.5 \text{ mM}$ ,  $[\text{Eu}^{3+}] = 10 \text{ mM}$  (♦),  $15 \text{ mM}$  (■),  $20 \text{ mM}$  (▲) and  $25 \text{ mM}$  (●);  $0.1 \text{ M KCl}$ ,  $25^\circ\text{C}$ )

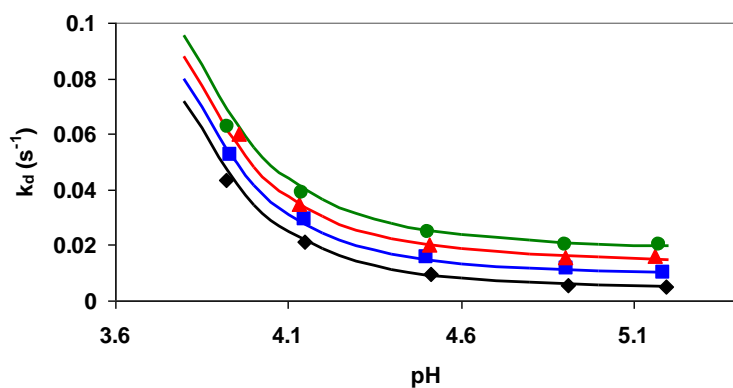

**Figure S4.** Pseudo-first order rate constants ( $k_d$ ) of the metal exchange reactions of  $[\text{Gd}(\text{EGTA})]^-$  with  $\text{Cu}^{2+}$  ions as a function of pH ( $[\text{Gd}(\text{EGTA})]^- = 0.1 \text{ mM}$ ,  $[\text{Cu}^{2+}] = 1 \text{ mM}$  (♦),  $2 \text{ mM}$  (■),  $3 \text{ mM}$  (▲) and  $4 \text{ mM}$  (●);  $0.1 \text{ M KCl}$ ,  $25^\circ\text{C}$ )

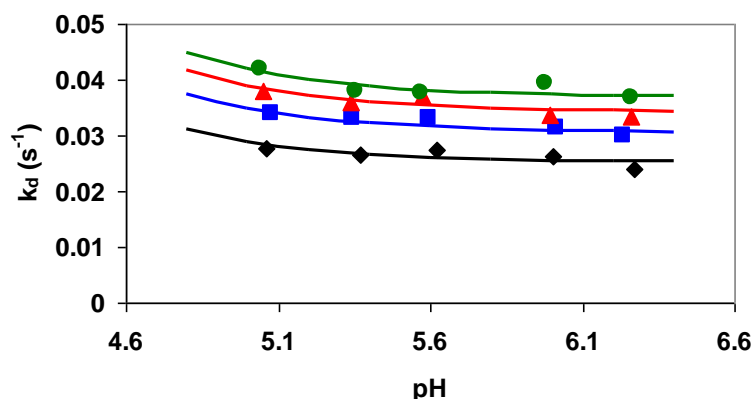

**Figure S5.** Pseudo-first order rate constants ( $k_d$ ) of the metal exchange reactions of  $[\text{Gd}(\text{EGTA})]^-$  with  $\text{Eu}^{3+}$  ions as a function of pH ( $[\text{Gd}(\text{EGTA})]^- = 1.0 \text{ mM}$ ,  $[\text{Eu}^{3+}] = 20 \text{ mM}$  (♦),  $30 \text{ mM}$  (■),  $40 \text{ mM}$  (▲) and  $50 \text{ mM}$  (●);  $0.1 \text{ M KCl}$ ,  $25^\circ\text{C}$ ).

These figures show that  $k_d$  values exhibit a similar dependence in the reactions with  $\text{Cu}^{2+}$  and  $\text{Eu}^{3+}$ .  $k_d$  values increase with increase of  $[\text{H}^+]$  and also with increasing  $[\text{Cu}^{2+}]$  or  $[\text{Eu}^{3+}]$  at  $\text{pH} > 4.5$ . The increase in  $k_d$  values with increasing  $\text{H}^+$  concentration can be interpreted in terms of proton assisted dissociation of  $[\text{Gd}(\text{L1})]^-$  and  $[\text{Gd}(\text{EGTA})]^-$  followed by a fast reaction between free ligand and exchanging metal ions ( $\text{Cu}^{2+}$  or  $\text{Eu}^{3+}$ ). The dependence of  $k_d$  on  $[\text{H}^+]$  can be expressed as a first- and second-order function of  $[\text{H}^+]$  which indicates that the exchange can take place by proton-independent (Eq. 10) and proton assisted (Eqs. 11 and 12) pathways. The proton assisted dissociation of  $[\text{Gd}(\text{L1})]^-$  and  $[\text{Gd}(\text{EGTA})]^-$  can be explained by the formation of a protonated  $[\text{Gd}(\text{HL1})]$  and  $[\text{Gd}(\text{HEGTA})]$  complexes, which dissociate through spontaneous (Eq. 11) and proton-assisted (Eq. 12) pathways.

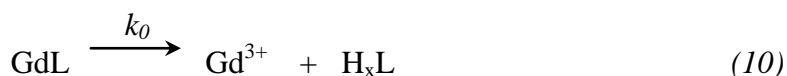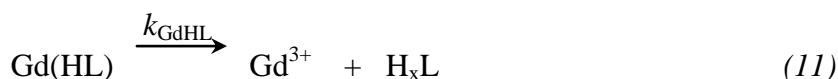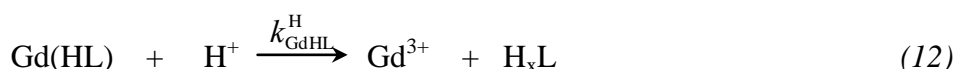

The increase in exchange reaction rate with increasing  $[\text{Cu}^{2+}]$  or  $[\text{Eu}^{3+}]$  indicates that the reaction can take place by direct attack of the exchanging metal ion to the complex, via formation of dinuclear intermediates (Eq. 13).

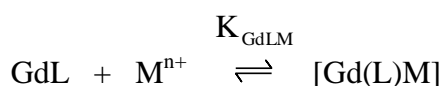

$$K_{\text{GdLM}} = \frac{[\text{Gd(L)M}]}{[\text{Gd(L)}][\text{M}^{n+}]} \quad (13)$$

It can be assumed that in the dinuclear intermediate  $[\text{Gd(L)M}]$ , the functional groups of **L1** and EGTA are slowly transferred from the  $\text{Gd}^{3+}$  to the attacking  $\text{Cu}^{2+}$  or  $\text{Eu}^{3+}$  step by step (Eq. 14).

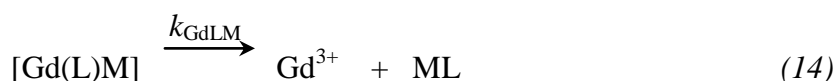

At  $\text{pH} < 4.5$ , the exchanging metal ions attack the protonated  $[\text{Gd(HL1)}]$  and  $[\text{Gd(HEGTA)}]$ . In case of protonated and dinuclear complexes, the functional groups of **L1** and EGTA are weakly coordinated to the  $\text{Gd}^{3+}$  ion and they slowly transfer from the  $\text{Gd}^{3+}$  to the attacking  $\text{Cu}^{2+}$  and  $\text{Eu}^{3+}$  ions (Eq. 15).

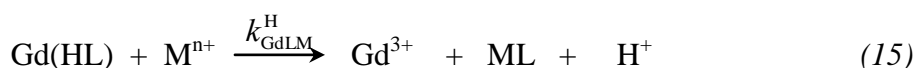

The  $k_0$ ,  $k_{\text{GdHL}}$ ,  $k_{\text{GdHL}}^{\text{H}}$ ,  $k_{\text{GdLM}}$  and  $k_{\text{GdLM}}^{\text{H}}$  rate constants characterize the dissociation of  $[\text{Gd(L1)}]^-$  and  $[\text{Gd(EGTA)}]^-$  via spontaneous, proton-assisted, metal-assisted and proton-metal-assisted (when the exchanging metal attacks the protonated complexes) reaction pathways, respectively. The  $K_{\text{GdHL}}$  and  $K_{\text{GdLM}}$  are the protonation constants of the protonated complexes and the stability constant of the mixed dinuclear intermediate complexes, respectively (where  $K_{\text{GdHL}} = [\text{Gd(HL)}]/[\text{Gd(L)}][\text{H}^+]$ ,  $K_{\text{GdLM}} = [\text{Gd(L)M}]/[\text{Gd(L)}][\text{M}]$ ). The protonation constant of the  $[\text{Gd(L1)}]^-$  and  $[\text{Gd(EGTA)}]^-$  complexes were determined by pH-potentiometric titration ( $[\text{Gd(L1)}]^-$ :  $\log K_{\text{MHL}} = 3.07$ ;  $[\text{Gd(EGTA)}]^-$ :  $\log K_{\text{MHL}} = 1.89$  in Table 2) and used for the calculation of the kinetic parameters.

By taking into account all the possible pathways and the rate of the transmetallation of  $[\text{Gd(L1)}]^-$  and  $[\text{Gd(EGTA)}]^-$  (Eq. 9), the pseudo-first-order rate constant ( $k_d$ ) can be defined by Equation (16).

$$-\frac{[\text{GdL}]_t}{dt} = k_0[\text{GdL}] + k_{\text{GdHL}}[\text{Gd(HL)}] + k_{\text{GdHL}}^{\text{H}}[\text{Gd(HL)}][\text{H}^+] + k_{\text{GdLM}}[\text{Gd(L)M}] + k_{\text{GdLM}}^{\text{H}}[\text{Gd(HL)}][\text{M}] \quad (16)$$

By taking into account the total concentration of the complex ( $[\text{GdL}]_{\text{tot}} = [\text{GdL}] + [\text{Gd(HL)}] + [\text{Gd(L)M}]$ ) and the equations of protonation and stability constants of the intermediates ( $K_{\text{GdHL}}$  and  $K_{\text{GdLM}}$ ), the pseudo-first-order rate constant can be expressed as follows:

$$k_d = \frac{k_0 + k_1[\text{H}^+] + k_2[\text{H}^+]^2 + k_3[\text{M}^{n+}] + k_4[\text{M}][\text{H}^+]}{1 + K_{\text{GdHL}}[\text{H}^+] + K_{\text{GdLM}}[\text{M}]} \quad (17)$$

where,  $k_0$ , and  $k_1 = k_{\text{GdHL}} \cdot K_{\text{GdHL}}$ ,  $k_2 = k_{\text{GdHL}}^{\text{H}} \cdot K_{\text{GdHL}}$ ,  $k_3 = k_{\text{GdLM}} \cdot K_{\text{GdLM}}$  and  $k_4 = k_{\text{GdLM}}^{\text{H}} \cdot K_{\text{GdHL}}$  characterize the spontaneous, proton-, metal- and proton-metal-assisted dissociation of  $[\text{Gd(L1)}]^-$  and  $[\text{Gd(EGTA)}]^-$ , respectively. Rate constants, protonation and stability constants have been calculated by fitting the  $k_d$  values to the Eq. (17).

### 3. Variable temperature $^1\text{H}$ and $^{13}\text{C}$ NMR spectra

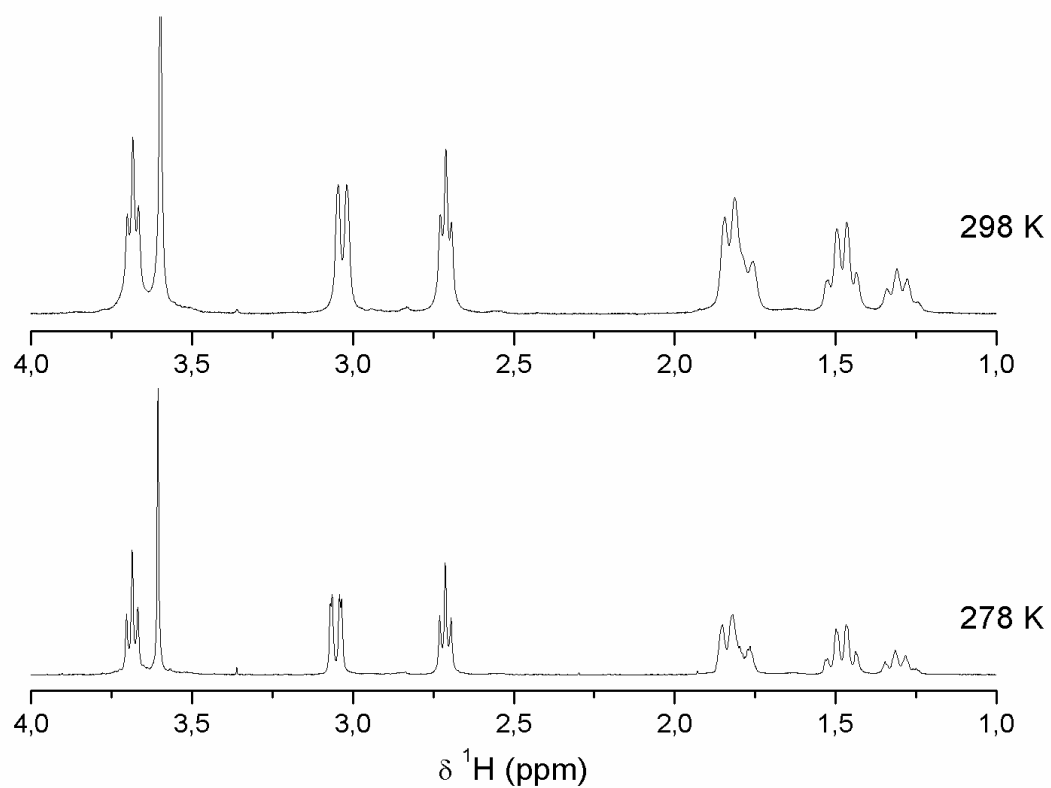

**Figure S6.** VT  $^1\text{H}$  NMR spectra for  $[\text{La}(\text{L1})]^-$  at 9.4 T.

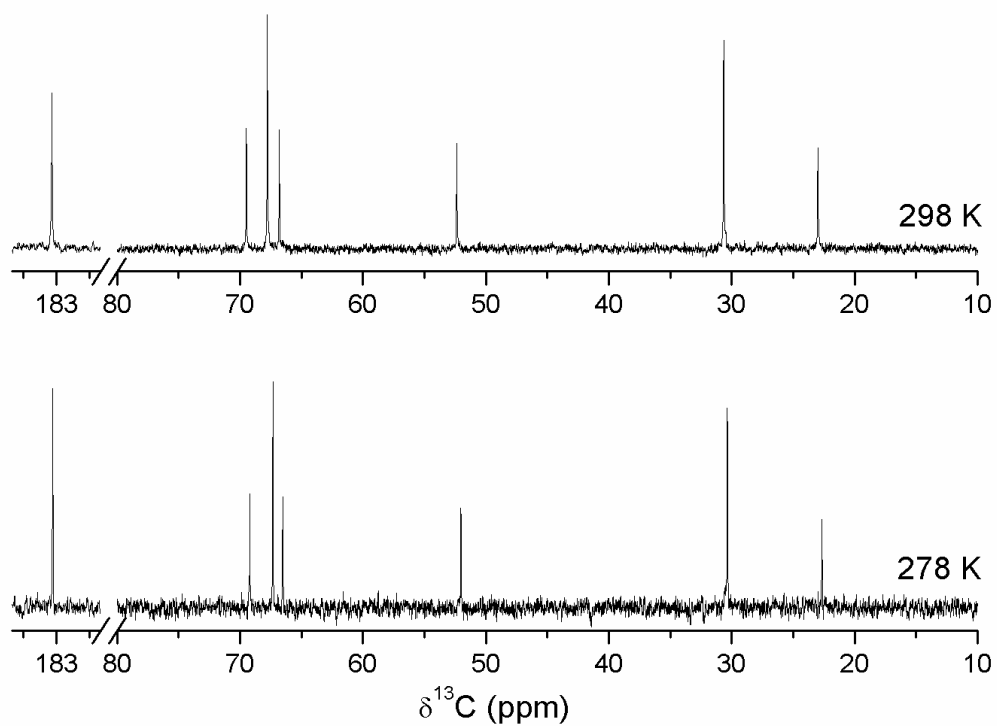

**Figure S7.** VT  $^{13}\text{C}$  NMR spectra for  $[\text{La}(\text{L1})]^-$  at 9.4 T.

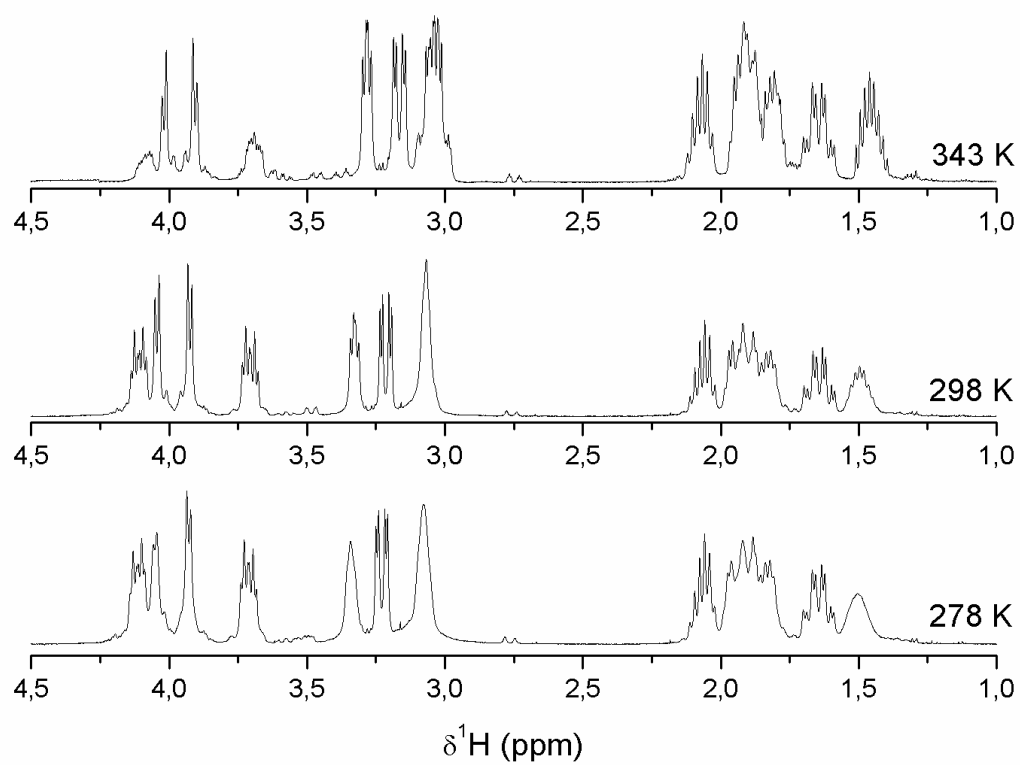

**Figure S8.** VT  $^1\text{H}$  NMR spectra for  $[\text{Lu}(\text{L1})]^-$  at 9.4 T.

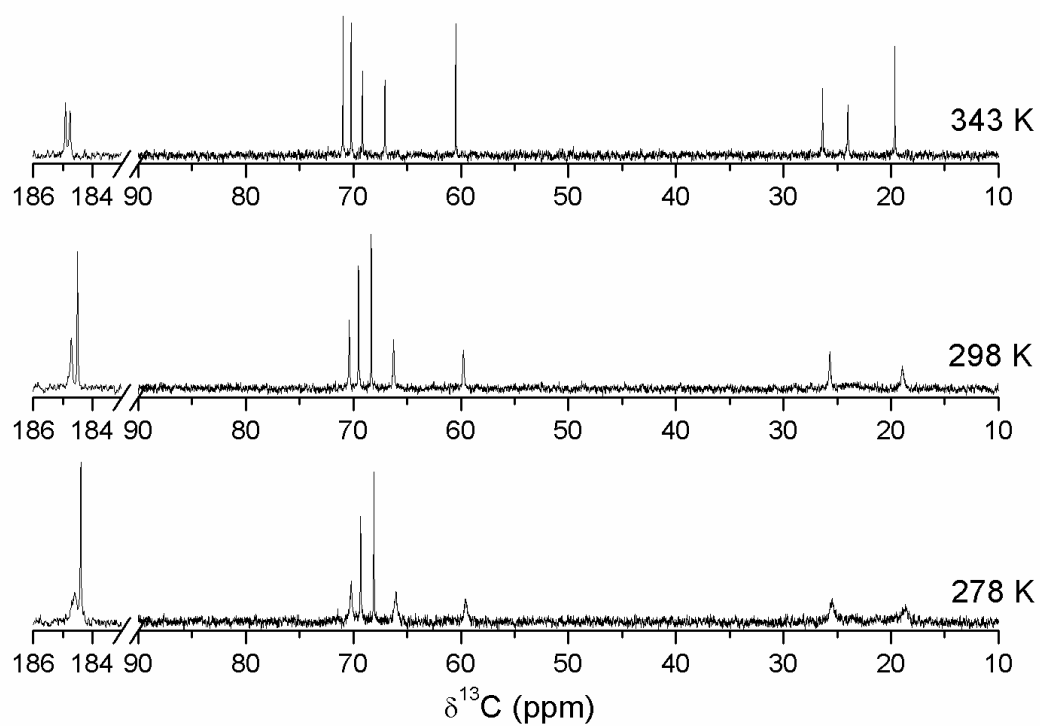

**Figure S9.** VT  $^{13}\text{C}$  NMR spectra for  $[\text{Lu}(\text{L1})]^-$  at 9.4 T.

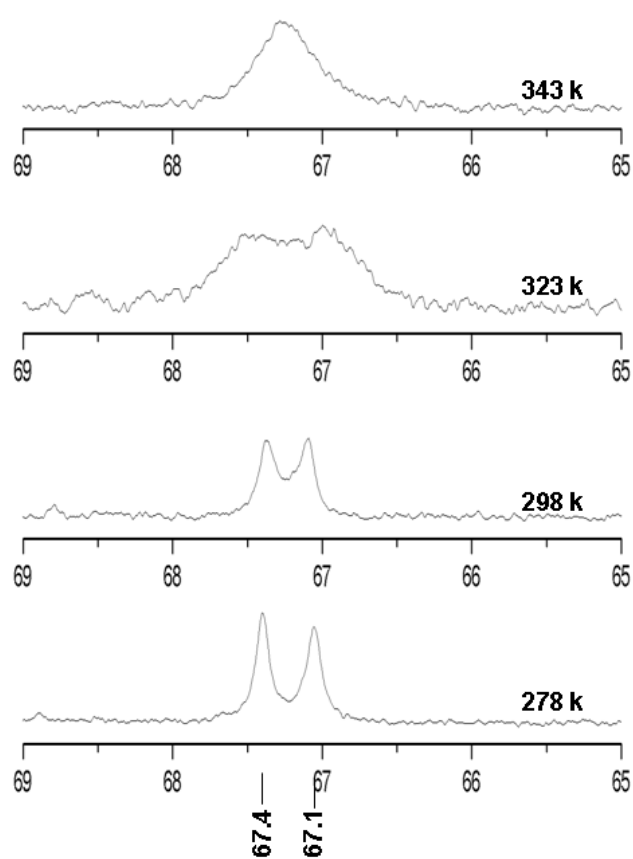

**Figure S10.** VT  $^{13}\text{C}$  NMR spectra for  $[\text{Y}(\text{L1})]^-$  at 9.4 T; magnification of the region of the  $-\text{CH}$  carbons.

#### 4. Relaxometric properties

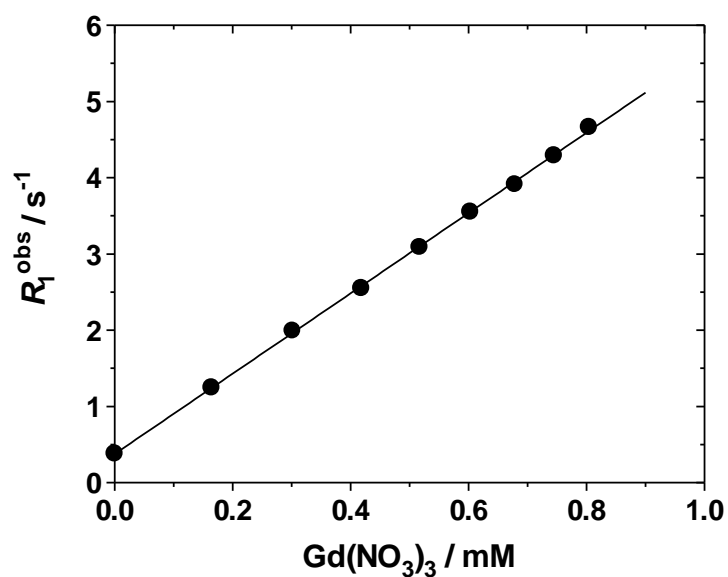

**Figure S11.** Variation of the relaxation rate, at 20 MHz and 298 K, of a 0.8 mM solution of **L1** following stepwise additions of a stock solution of Gd(NO<sub>3</sub>)<sub>3</sub>. A large and non linear increase of  $R_1$  indicates that the Gd/**L1** ratio is higher than one. In that case a further small addition of ligand restores the 1:1 molar ratio and the  $R_1$  value returns to the straight line. The slope of the line ( $5.2 \text{ mM}^{-1} \text{ s}^{-1}$ ;  $R=0.9998$ ) corresponds to the  $r_{1p}$  value of  $[\text{Gd}(\text{L1})]^-$ .

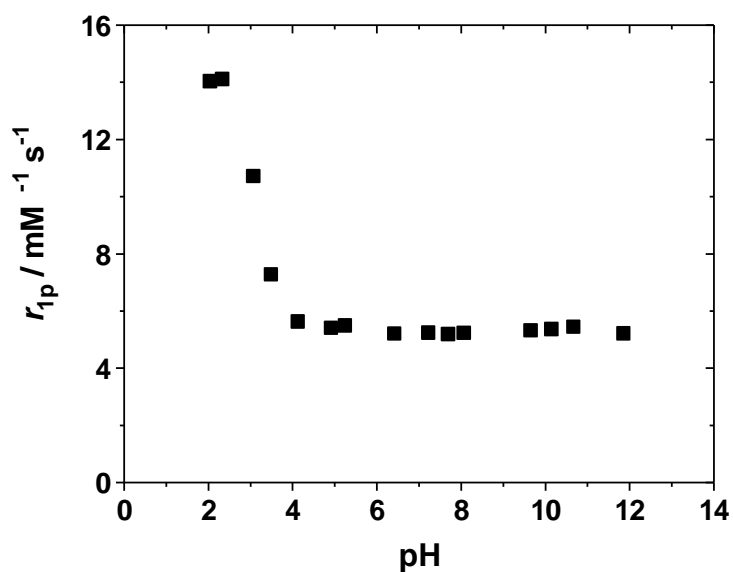

**Figure S12.** Plot of  $R_1$  of  $[\text{Gd}(\text{L1})]^-$  on pH variation (20 MHz, 298 K).
